# Supplementary material for: Single-molecule imaging of glycan–lectin interactions on cells with Glyco-PAINT
Source: Springer Nature journal article supplement (doi:10.1038/s41589-021-00896-2), 2021-11-11
Supplement: 41589_2021_896_MOESM63_ESM.mol [file 41589_2021_896_MOESM63_ESM.mol]

nchembio.A201012140C-comp33.mol
  ChemDraw09092113522D

 23 22  0  0  1  0  0  0  0  0999 V2000
   -1.0164   -2.6812    0.0000 N   0  3  0  0  0  0  0  0  0  0  0  0
    1.1270    1.0313    0.0000 O   0  0  0  0  0  0  0  0  0  0  0  0
    0.4125    0.6187    0.0000 C   0  0  0  0  0  0  0  0  0  0  0  0
    0.4125   -0.2062    0.0000 C   0  0  0  0  0  0  0  0  0  0  0  0
   -0.3020   -0.6187    0.0000 C   0  0  0  0  0  0  0  0  0  0  0  0
   -0.3020   -1.4437    0.0000 O   0  0  0  0  0  0  0  0  0  0  0  0
   -1.0164   -0.2062    0.0000 C   0  0  0  0  0  0  0  0  0  0  0  0
   -1.7309   -0.6187    0.0000 O   0  0  0  0  0  0  0  0  0  0  0  0
   -1.0164    0.6187    0.0000 C   0  0  0  0  0  0  0  0  0  0  0  0
   -0.3020    1.0313    0.0000 O   0  0  0  0  0  0  0  0  0  0  0  0
   -1.7309    1.0313    0.0000 C   0  0  0  0  0  0  0  0  0  0  0  0
   -2.4454    0.6187    0.0000 O   0  0  0  0  0  0  0  0  0  0  0  0
    1.8414   -0.2062    0.0000 C   0  0  0  0  0  0  0  0  0  0  0  0
    2.5559   -0.6187    0.0000 C   0  0  0  0  0  0  0  0  0  0  0  0
    1.8414    0.6187    0.0000 O   0  0  0  0  0  0  0  0  0  0  0  0
    1.1270   -0.6187    0.0000 N   0  0  0  0  0  0  0  0  0  0  0  0
   -1.7309   -1.4437    0.0000 S   0  0  0  0  0  0  0  0  0  0  0  0
   -0.9059   -1.4437    0.0000 O   0  0  0  0  0  0  0  0  0  0  0  0
   -2.5559   -1.4437    0.0000 O   0  0  0  0  0  0  0  0  0  0  0  0
   -1.7309   -2.2687    0.0000 O   0  5  0  0  0  0  0  0  0  0  0  0
    1.1270    1.8562    0.0000 C   0  0  0  0  0  0  0  0  0  0  0  0
    1.8414    2.2687    0.0000 C   0  0  0  0  0  0  0  0  0  0  0  0
    2.5559    2.6812    0.0000 C   0  0  0  0  0  0  0  0  0  0  0  0
  3  2  1  1      
  3  4  1  0      
  4  5  1  0      
  5  6  1  1      
  5  7  1  0      
  7  8  1  1      
  7  9  1  0      
  9 10  1  0      
  9 11  1  1      
 11 12  1  0      
  3 10  1  0      
 13 14  1  0      
 13 15  2  0      
 13 16  1  0      
  4 16  1  6      
 17 18  2  0      
 17 19  2  0      
 17 20  1  0      
  8 17  1  0      
 21 22  1  0      
 22 23  3  0      
  2 21  1  0      
M  CHG  2   1   1  20  -1
M  END
